# Supplementary material
Source: MDPI journal article supplement (https://www.mdpi.com/2227-7102/11/9/468)
Supplement: s1 [file s1]

**Supplementary Table S1.**

| Factors                              | Dependent Variable | <i>F</i><br><i>df</i> (1,55) | <i>p</i> | $\eta_p^2$ |
|--------------------------------------|--------------------|------------------------------|----------|------------|
| ASSESSMENT                           | Deep               | 1.520                        | 0.223    | .027       |
|                                      | Surface            | 0.022                        | 0.883    | .000       |
|                                      | Deep Motive        | 1.287                        | 0.261    | .023       |
|                                      | Deep Strategy      | 0.864                        | 0.357    | .015       |
|                                      | Surface Motive     | 0.081                        | 0.777    | .001       |
|                                      | Surface Strategy   | 0.309                        | 0.581    | .006       |
| FEEDBACK                             | Deep               | 0.066                        | 0.798    | .001       |
|                                      | Surface            | 0.336                        | 0.565    | .006       |
|                                      | Deep Motive        | 0.058                        | 0.811    | .001       |
|                                      | Deep Strategy      | 0.467                        | 0.497    | .008       |
|                                      | Surface Motive     | 1.416                        | 0.239    | .025       |
|                                      | Surface Strategy   | 0.088                        | 0.768    | .002       |
| CHOICE                               | Deep               | 0.073                        | 0.788    | .001       |
|                                      | Surface            | 0.245                        | 0.622    | .004       |
|                                      | Deep Motive        | 0.751                        | 0.390    | .013       |
|                                      | Deep Strategy      | 1.824                        | 0.182    | .032       |
|                                      | Surface Motive     | 0.012                        | 0.914    | .000       |
|                                      | Surface Strategy   | 0.522                        | 0.473    | .009       |
| ASSESSMENT x<br>FEEDBACK             | Deep               | 1.072                        | 0.305    | .019       |
|                                      | Surface            | 0.583                        | 0.448    | .010       |
|                                      | Deep Motive        | 3.619                        | 0.062    | .062       |
|                                      | Deep Strategy      | 0.039                        | 0.845    | .001       |
|                                      | Surface Motive     | 0.064                        | 0.801    | .001       |
|                                      | Surface Strategy   | 1.041                        | 0.312    | .019       |
| ASSESSMENT x<br>CHOICE               | Deep               | 0.865                        | 0.356    | .015       |
|                                      | Surface            | 0.462                        | 0.500    | .008       |
|                                      | Deep Motive        | 0.605                        | 0.440    | .011       |
|                                      | Deep Strategy      | 0.611                        | 0.438    | .011       |
|                                      | Surface Motive     | 0.324                        | 0.571    | .006       |
|                                      | Surface Strategy   | 0.291                        | 0.592    | .005       |
| FEEDBACK x<br>CHOICE                 | Deep               | 3.542                        | 0.065    | .061       |
|                                      | Surface            | 1.430                        | 0.237    | .025       |
|                                      | Deep Motive        | 0.702                        | 0.406    | .013       |
|                                      | Deep Strategy      | 5.469                        | 0.023*   | .090       |
|                                      | Surface Motive     | 0.204                        | 0.653    | .004       |
|                                      | Surface Strategy   | 2.370                        | 0.129    | .041       |
| ASSESSMENT x<br>FEEDBACK x<br>CHOICE | Deep               | 0.700                        | 0.407    | .013       |
|                                      | Surface            | 1.181                        | 0.282    | .021       |
|                                      | Deep Motive        | 0.219                        | 0.642    | .004       |
|                                      | Deep Strategy      | 0.885                        | 0.351    | .016       |
|                                      | Surface Motive     | 2.361                        | 0.130    | .041       |
|                                      | Surface Strategy   | 0.037                        | 0.849    | .001       |
